# Supplementary material for: Insights in the (un)structural organization of Bacillus pasteurii UreG, an intrinsically disordered GTPaseenzyme
Source: Royal Society of Chemistry journal article supplement (doi:10.1039/c1mb05227f), 2011-09-16

## Insights in the (un)structural organization of *Bacillus pasteurii* UreG, an intrinsically disordered GTPase enzyme

Barbara Zambelli, Nunilo Cremades, Paolo Neyroz, Paola Turano, Vladimir Uversky and Stefano Ciurli

**Table ESI-1.** Free energy of unfolding calculated from the fluorescence data for the conformational transitions of *Bp*UreG at different temperatures, with a fixed denaturant concentration index ( $m = 1.57 \text{ kcal mol}^{-1}\text{M}^{-1}$ ).

| Temperature (°C) | $\Delta G_{0,\text{un}}$ (kcal mol <sup>-1</sup> ) |
|------------------|----------------------------------------------------|
| 10               | $0.610 \pm 0.23$                                   |
| 20               | $1.012 \pm 0.16$                                   |
| 25               | $1.148 \pm 0.12$                                   |
| 30               | $1.092 \pm 0.08$                                   |
| 40               | $1.043 \pm 0.09$                                   |
| 50               | $0.644 \pm 0.28$                                   |

**Figure ESI-1.** Thermal denaturation of *Bp*UreG followed by far-UV circular dichroism in the presence or absence of 1mM TCEP. All the spectra refer to equal protein concentrations.

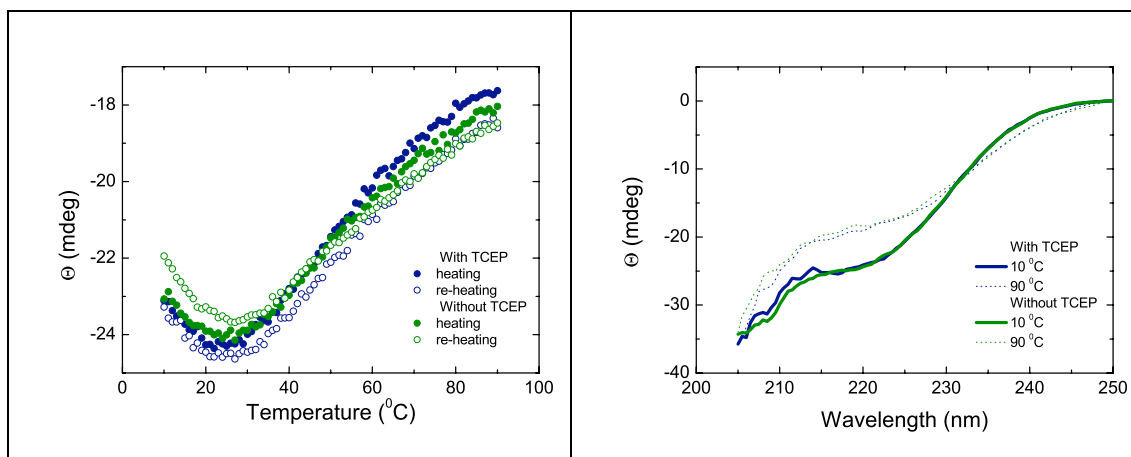

**Figure ESI-2.** Temperature-induced denaturation of *BpUreG* at different GuHCl concentrations. The four thermal curves show the expected behaviour according to the phase diagram presented in Figure 6. The complete far-UV CD spectra of the temperature-induced denaturation of the protein at 0 M (top left), 0.92 M (top right), and 2 M (bottom left) are shown in the bottom panels. All the spectra refer to equal protein concentrations.

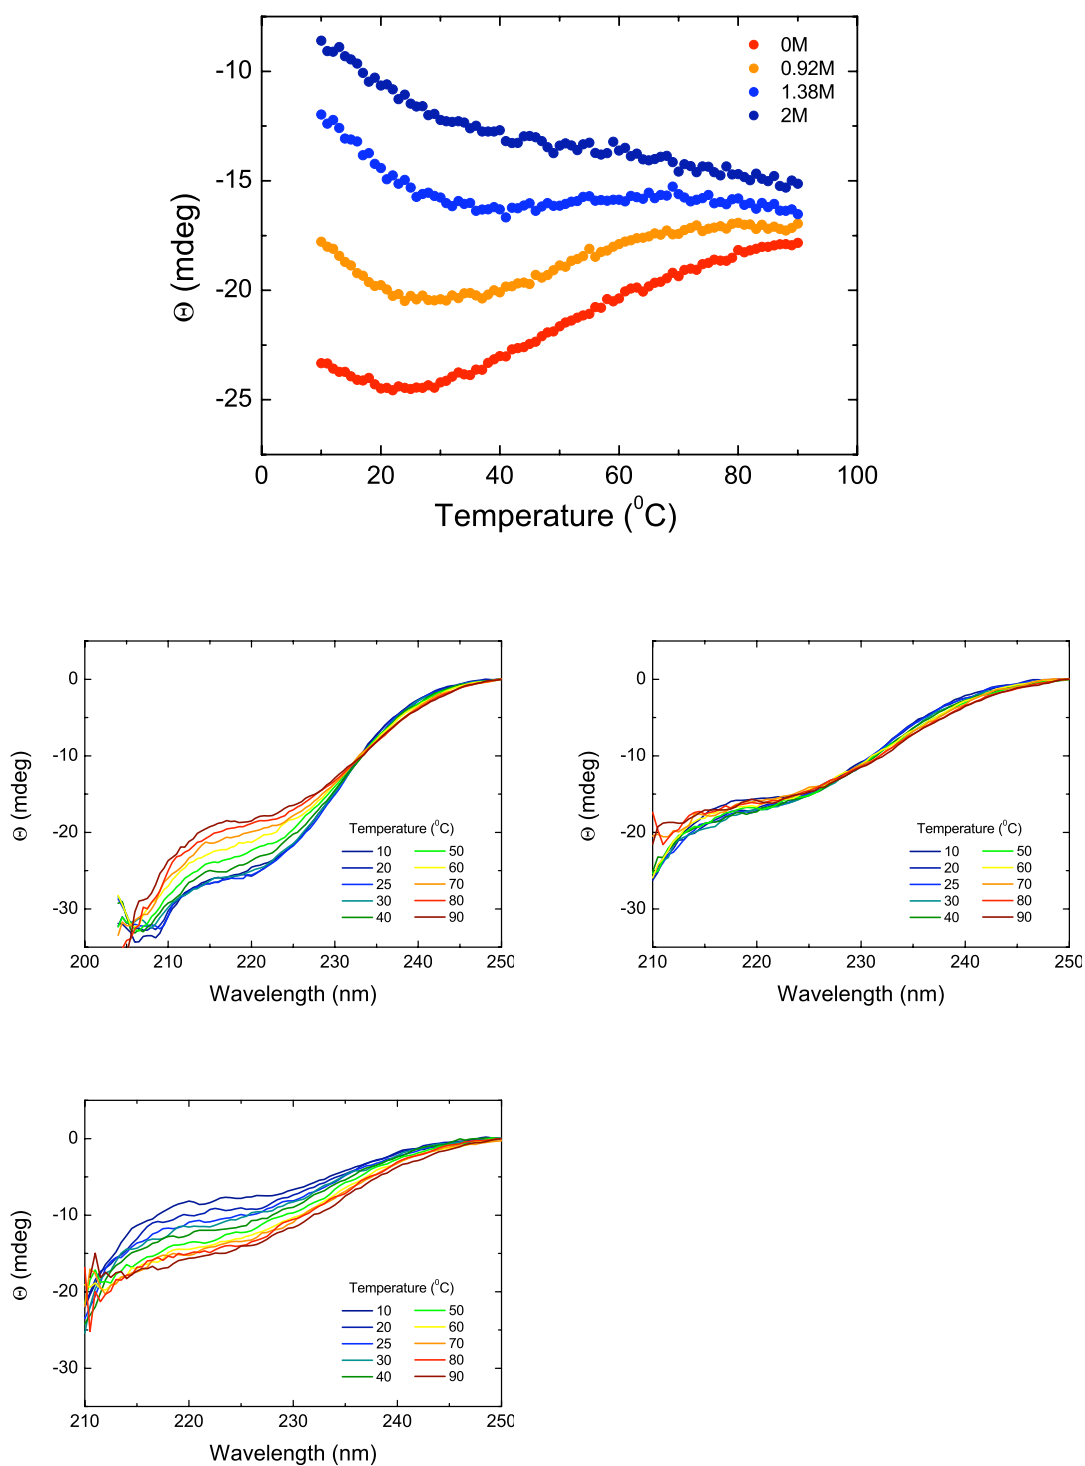

**Figure ESI-3.** Far-UV CD spectra of *BpUreG* and protein buffer at 10 °C, in the absence and in the presence of 2.5 M GuHCl. All the protein spectra were recorded at the same *BpUreG* concentration.

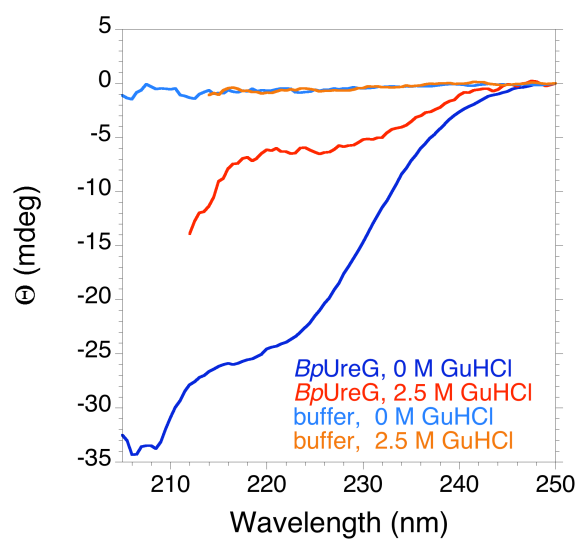

Supplement: c1mb05227f.pdf [file c1mb05227f.pdf]
